# Supplementary material for: Antiferromagnetic vs. non-magnetic ε phase of solid oxygen. Periodic density functional theory studies using a localized atomic basis set and the role of exact exchange
Source: Royal Society of Chemistry journal article supplement (doi:10.1039/c6cp07445f), 2016-12-17
Supplement: c6cp07445f1.pdf [file c6cp07445f1.pdf]

## Supporting Information for:

### **Antiferromagnetic vs. non-magnetic $\varepsilon$ phase of solid oxygen. Periodic Density Functional Theory studies using localized atomic basis and the role of exact exchange.**

A. Ramírez-Solís,\*<sup>a</sup> C. M. Zicovich-Wilson<sup>a</sup> R. Hernández-Lamonedab and A. J. Ochoa-Calle<sup>c</sup>

---

<sup>a</sup>*Depto. de Física, Centro de Investigación en Ciencias, IICBA. Universidad Autónoma del Estado de Morelos. Av. Universidad 1001, Cuernavaca. Morelos 62209, México. Corresponding author: alex@uaem.mx.*

<sup>b</sup>*Centro de Investigaciones Químicas, IICBA. Universidad Autónoma del Estado de Morelos.*

<sup>c</sup>*Departamento de Ciencias Físicas, Universidad EAFIT, Carrera 49 No. 7 Sur-50, Medellín – Colombia*

## Supplementary Material

The following figures show the pressure evolution of the intramolecular angle in the unit cell for the antiferromagnetic (AF1, AF2) and non-magnetic (NM) unit cell models. Note that this angle remains ca. 90° for the completely non-magnetic structure at all pressures in good agreement with the experimental  $C2/m$  crystal group for the  $\epsilon$  phase of solid oxygen.

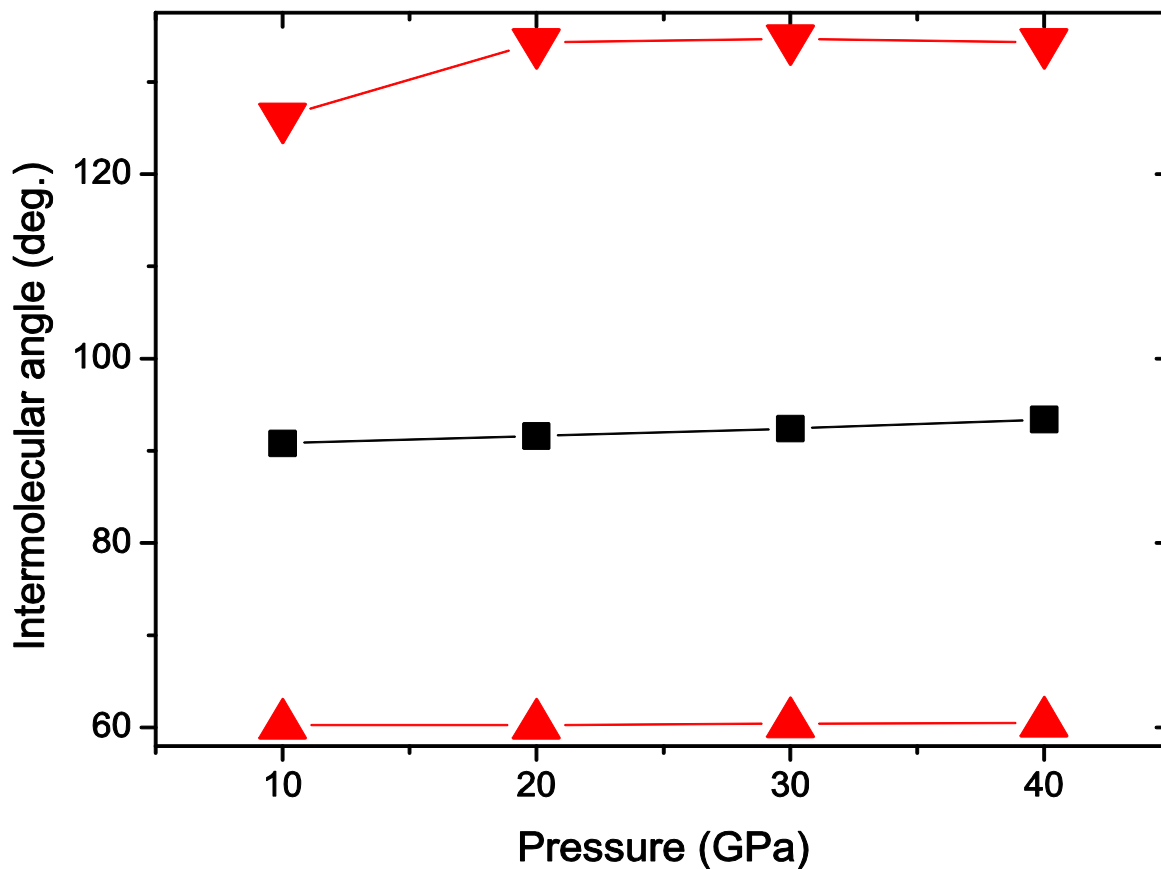

**Fig. S1** Intramolecular angle in the  $(O_2)_4$  unit cell for the AF1 (red up triangles), AF2 (red down triangles) and non-magnetic (black squares) models for the  $\epsilon$  phase at the PBE level of theory. The experimental value is 90°.

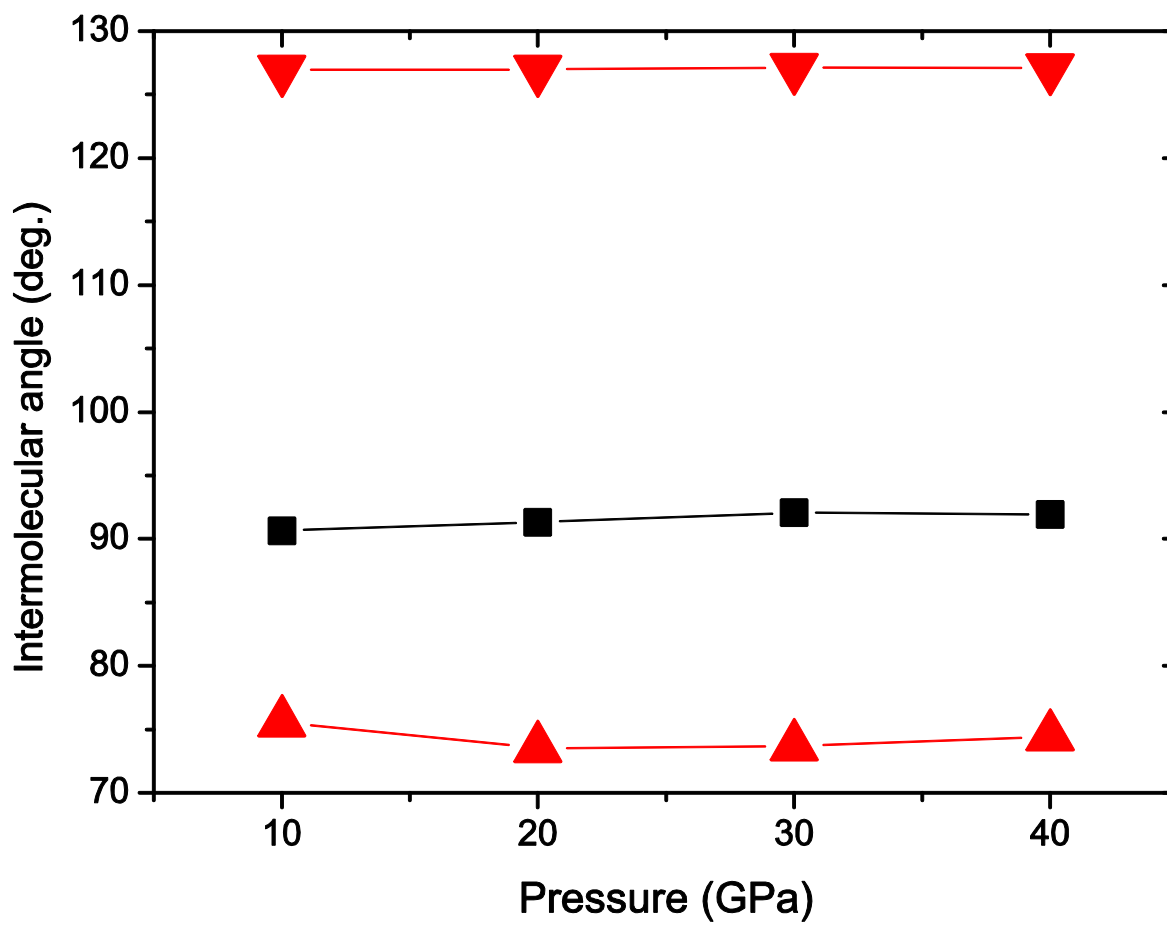

**Fig. S2** Intramolecular angle in the  $(O_2)_4$  unit cell for the AF1 (red up triangles), AF2 (red down triangles) and non-magnetic (black squares) models for the  $\epsilon$  phase at the B3LYP level of theory. The experimental value is  $90^\circ$ .

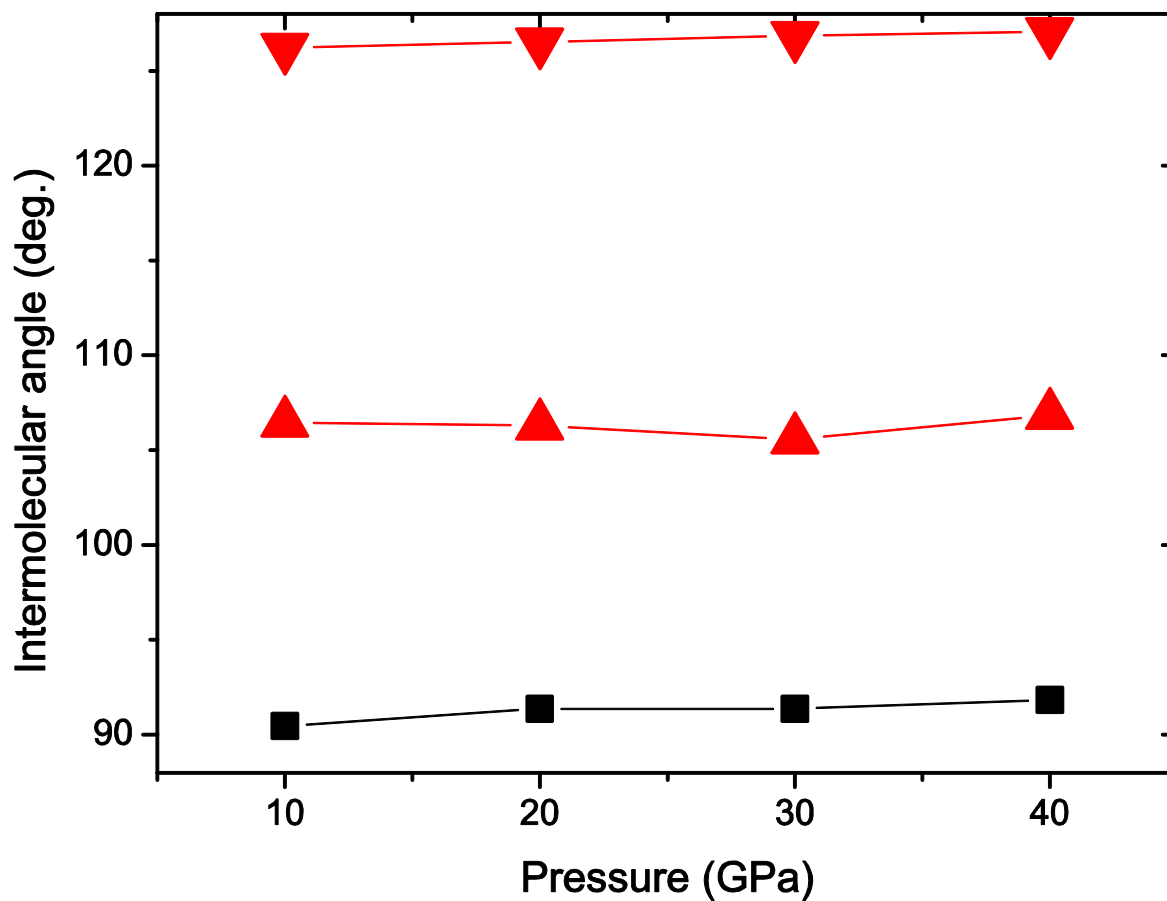

**Fig. S3** Intramolecular angle in the  $(O_2)_4$  unit cell for the AF1 (red up triangles), AF2 (red down triangles) and non-magnetic models (black squares) for the  $\epsilon$  phase at the PBE0 level of theory. The experimental value is  $90^\circ$ .
